# Supplementary material
Source: PubMed Central journal article supplement (PMC2040412)
Supplement: pnas_0703832104_5.pdf [file pnas_0703832104_5.pdf]

**Table 1.** Calculated pK<sub>a</sub> values for titratable residues in Aβ(1-28) and Aβ(10-42)

| Residue | Aβ (1-28) | Aβ (10-42) |
|---------|-----------|------------|
| NTER    | 7.1       | -          |
| Asp-1   | 2.9       | -          |
| Glu-3   | 2.4       | -          |
| His-6   | 6.5       | -          |
| Asp-7   | 2.0       | -          |
| Glu-11  | 3.2       | 3.5        |
| His-13  | 6.0       | 6.4        |
| His-14  | 5.5       | 6.1        |
| Glu-22  | 3.4       | 4.0        |
| Asp-23  | 2.9       | 3.8        |
| CTER    | 2.7       | 2.9        |

The standard pK<sub>a</sub> values used are: Asp, 4.0; Glu, 4.4; His, 6.55; α-amino, 7.5; α-carboxyl, 3.8. There is good agreement between the experimentally observed midpoints of the pH profile (3.8 and 6.0) in Aβ (1-40) (1) and the computed highest pK<sub>a</sub> value for carboxyl (4.0) and lowest pK<sub>a</sub> value for histidine (6.1) groups in Aβ (10-42).

1. Kirkitadze MD, Condron MM, Teplow DB (2001) *J Mol Biol* 321: 1103-1119.
