# Supplementary material
Source: PubMed Central journal article supplement (PMC2040412)

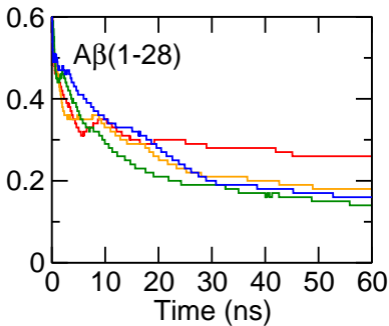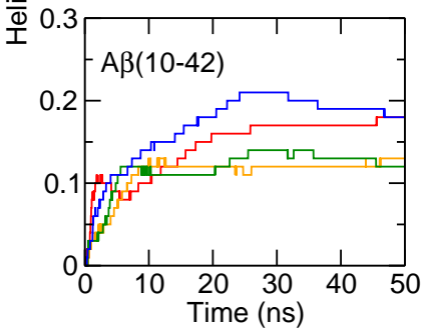

Supplement: pnas_0703832104_1.pdf [file pnas_0703832104_1.pdf]

Probability density

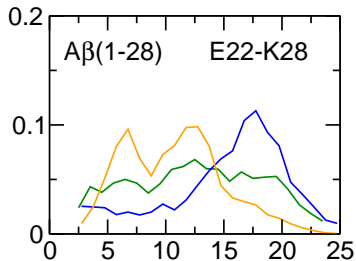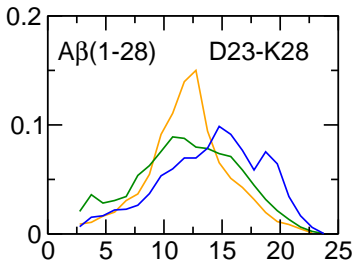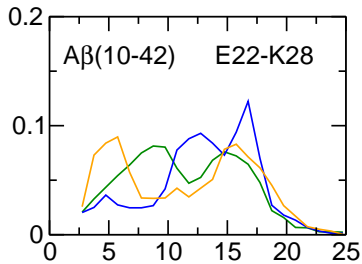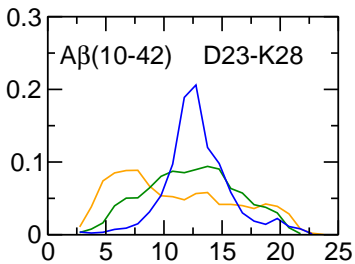

Distance (Å)

Supplement: pnas_0703832104_2.pdf [file pnas_0703832104_2.pdf]

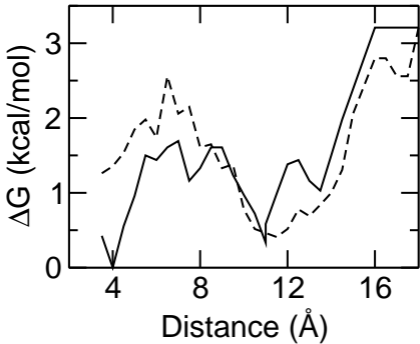

Supplement: pnas_0703832104_3.pdf [file pnas_0703832104_3.pdf]

# A $\beta$ (10-42)

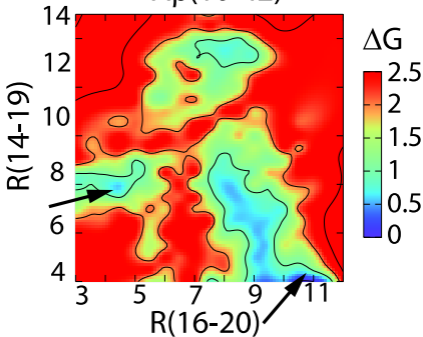

Supplement: pnas_0703832104_4.pdf [file pnas_0703832104_4.pdf]
